# Supplementary material for: Functional characterization of cotton genes responsive to Verticillium dahliae through bioinformatics and reverse genetics strategies
Source: PubMed Central journal article supplement (PMC4246195; doi:10.1093/jxb/eru393), 2014-10-17
Supplement: supp_eru393_jexbot130617_file001.pdf [file supp_eru393_jexbot130617_file001.pdf]

**Functional characterization of cotton genes responsive to  
*Verticillium dahliae* through bioinformatics and reverse  
genetics strategies**

Lian Xu, Wenwen Zhang, Xin He, Min Liu, Kun Zhang, Muhammad Shaban, Longqing Sun, Jiachen Zhu, Yijing Luo, Daojun Yuan, Xianlong Zhang and Longfu Zhu\*

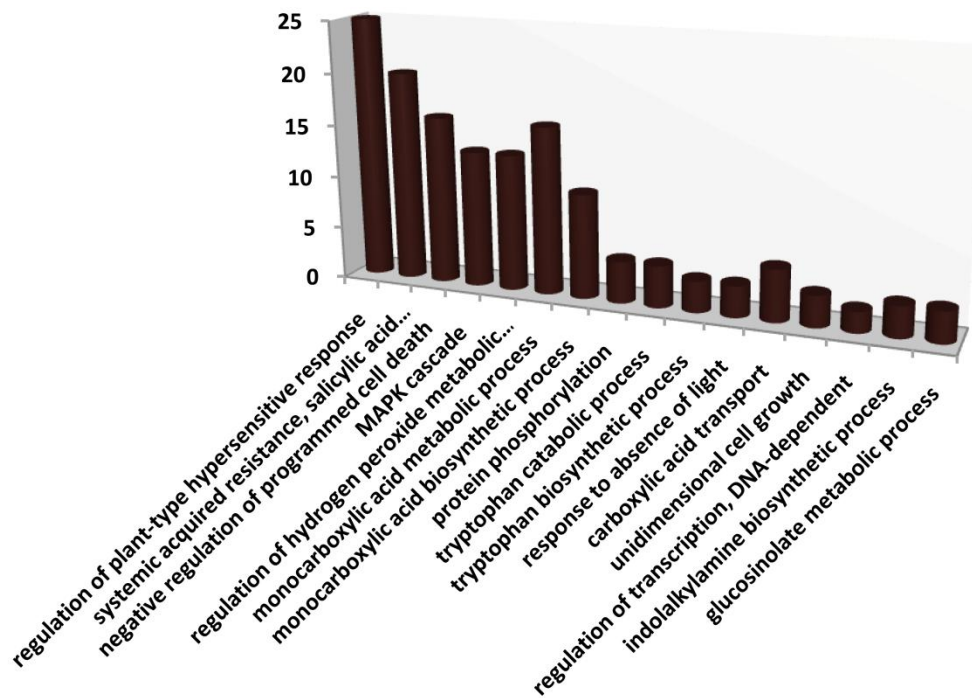

**Supplemental Figure 1** GO analysis of the SA or JA/ET-related genes at biological process level 7.

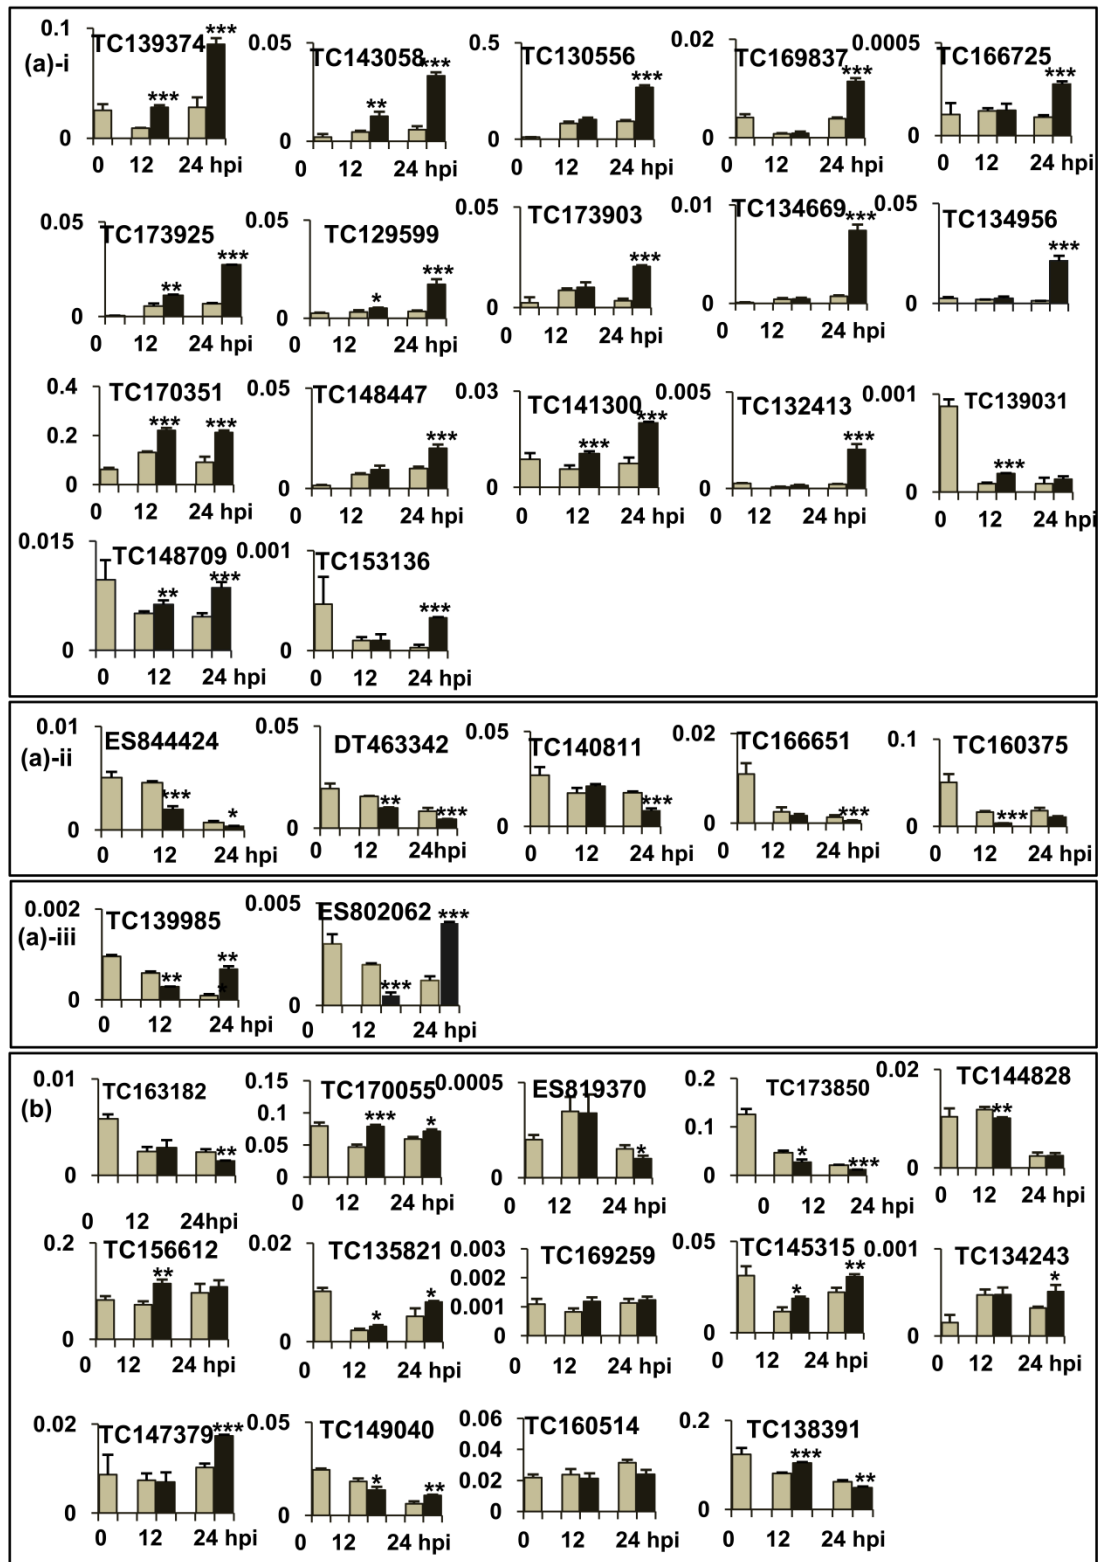

**Supplemental Figure 2** qPCR analysis of 38 candidate genes in cotton upon *V. dahliae* inoculation. **(A)** Twenty-four genes were differentially regulated ( $\log_2$  value  $\geq 1$ ;  $P < 0.0001$ ); 17 genes were significantly upregulated (i), 5 genes were downregulated (ii), and 2 genes showed complex expression patterns (iii). **(B)** In total,

fourteen genes were not regulated in a clear pattern post pathogen infection. Grey and black columns refer to the relative expression levels of candidate genes after mock and pathogen inoculation, respectively. X-axis represents hours post inoculation (hpi) with *V. dahliae*. Three technical repeats were performed. \*, \*\* and \*\*\* indicate significant differences relative to the control at  $P < 0.05$ ,  $P < 0.01$ , and  $P < 0.001$ , respectively.

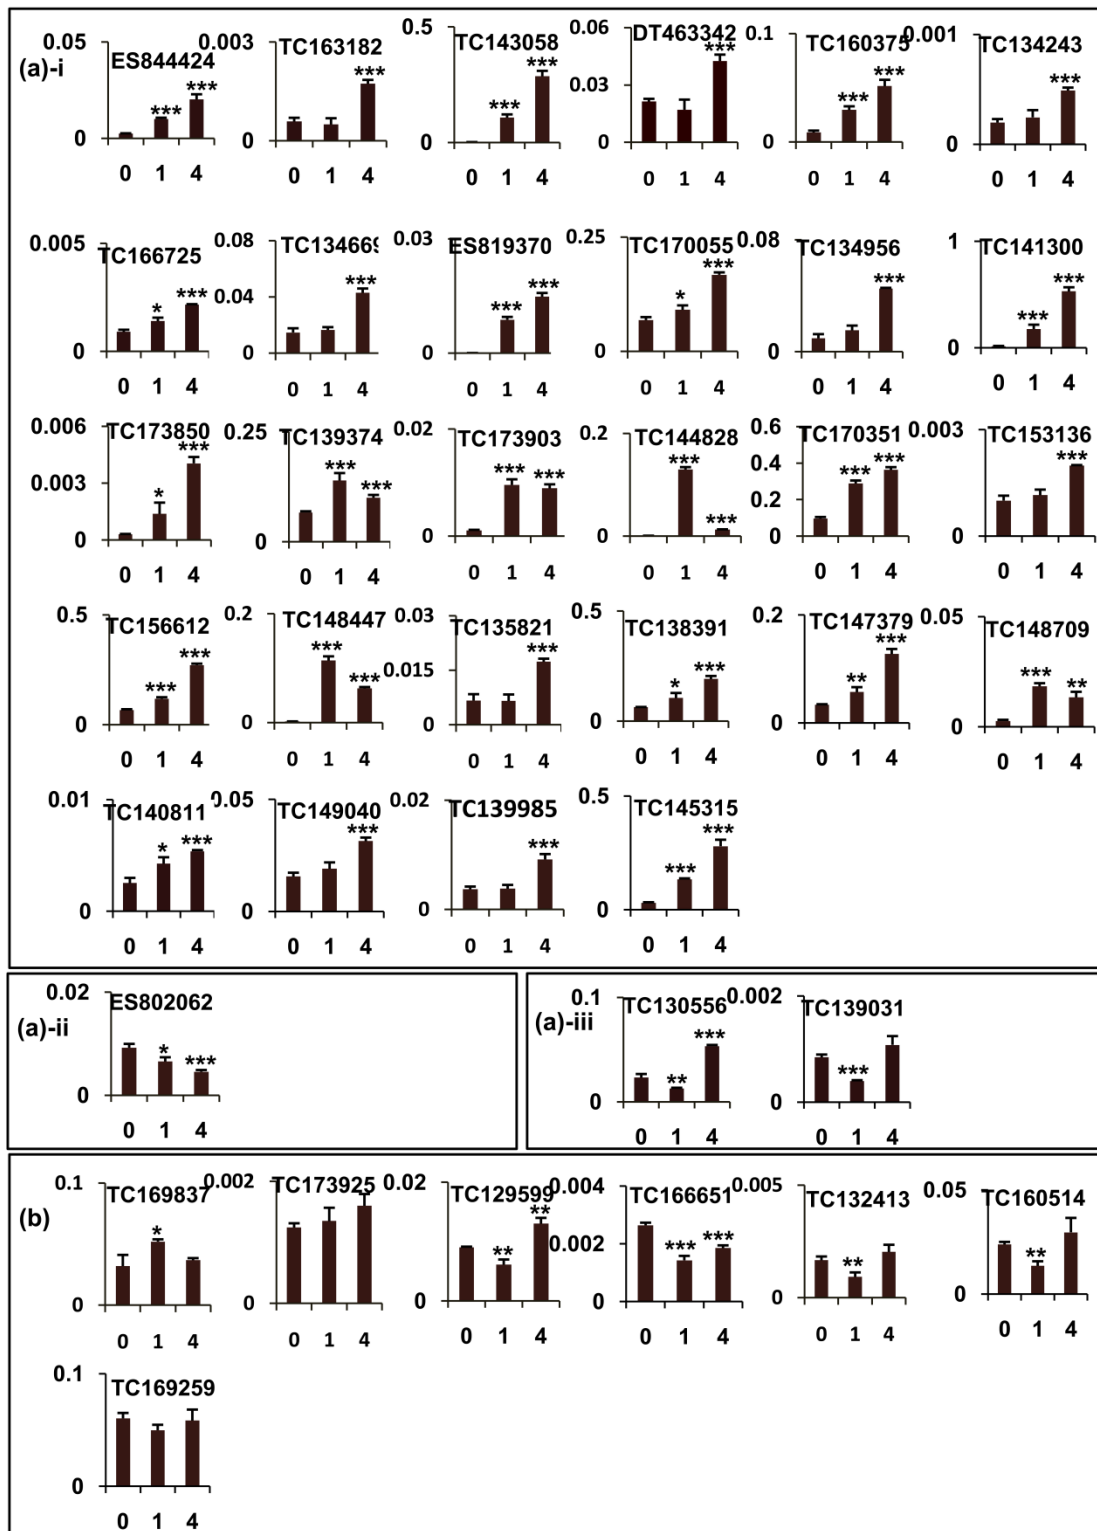

**Supplemental Figure 3** qPCR analysis of 38 candidate genes in cotton after JA treatment. **(A)** Thirty-one genes exhibited significant changes in expression levels ( $\log_2$  value  $\geq 1$ ;  $P < 0.0001$ ), with 28 genes significantly upregulated (i), 1 gene downregulated (iii) and 2 genes showing a complex expression pattern (ii). **(B)** Seven

genes were not regulated in a clear pattern after JA treatment. The columns refer to three technical repeats of gene relative expression level at indicated hours after JA treatment (0, 1 and 4 h). \*, \*\* and \*\*\* indicate significant differences relative to the control at  $P < 0.05$ ,  $P < 0.01$ , and  $P < 0.001$ , respectively.

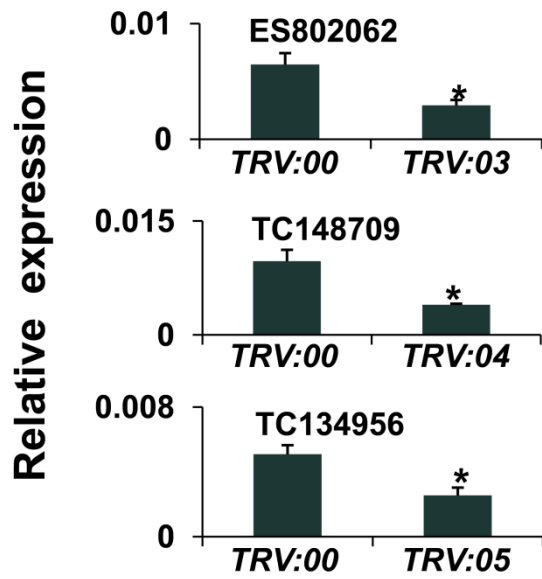

**Supplemental Figure 4** qPCR experiments were performed to analysis ES802062, TC148709 and TC134956 transcript abundances in root tissue of VIGS plants. *TRV:00*, *TRV:03*, *TRV:04* and *TRV:05* refer to vector control, ES802062, TC148709 and TC134956-VIGS plants, respectively. Each column represents a mean value for three biological repeats. \* indicates significant differences relative to the vector control at  $P < 0.05$ .

gaaaacgagaacatatatcaactaaagatagca  
atggacagaaaagggtggcattatgggtctggcataagtgccctctgctgcaaatcacattgtca  
M D R K V A I I G A G I S G L L A C K Y T L S  
aagggttttcatccaatagttttgagctccaagcactgtggagggtttggacaaaaccgtggag  
K... G F H P I V F E S Q S T V G G V W T K T V E  
accacaagctcaaacacctaaccagtttatcaattccgattccatggccggagtcggtctcg  
T T K L Q T P K P V Y Q F S D F P W P E S V S  
gaagatttccggacggacagaaggatattgattatgtaatgggtatgcaaagcattttgatttggt  
E D F P D G Q K V F D Y V N G Y A K H F D L V  
aagcacatcaaatcaatacaaaagtgttggtattgaattgaaggtcctaatgatgaagatccaa  
K H I K F N T K V V G I E F E G P N D E E I Q  
gcttggagtttgggggtgtaatggtagccttttgggtctaaagggaaatggaaggtgtgtgtaa  
A W S L W G C N G E P F G S K G K W K V V V E  
gatttggtaactcttccactgagattacaatgtgactttgtaactgttgggggagattcagt  
D L V T L S T E I Y N V D F V I V C V G R F S  
ggtttgccaacatccagaatttccccgaaaaaggccggaagcatttgatgtaaggttaatacat  
G L P N I P E F P P K K G P E A F D G K V I H  
tcaatggaatgatctcatggatcataaacaggctgctgaattcgtcaaaaggcaaacgagtcattgt  
S M E Y A A M D H K Q A A E F V K G K R V I V  
gttgggtttcaaaaatctgactcgcattgcagtgaggttctgctgctaatggaaggagatcca  
V G F Q K S A L D I A V E C S A A N G K E D P  
tgcacagttttatacaggacagctcactggaatgctcctgactatctcattggggattttacttgca  
C T V L Y R T A H W N V P D Y L P W G F S L A  
cacatgactttagcgttttccgagcttatggtcataagcctgggtaagggtcttcttccctc  
H M Y L S R F S E L M V H K P G E G L L L S L  
ttagccacaattctcacaccgctgagatgcatattcaaaattgtgaaagtattaaaaagaag  
L A T I L T P L R Y A Y S K F V E S D I K K K  
cttcttggaaaaacatgggagtggtcccaacacatagcttcccaagaaatcagctcatgttgatc  
L R L E K H G M V P T H S F L K E I S S C L I  
tcaactgtccgaaaaattctatgacaagggtgaaaaatggagaatcaaattgaaaaaggcccgaag  
S T V P E K F Y D K V E N G E I K L K K A P S  
tttagtttgcacaatggcgttttgggtgaagcgcagacctcaccgatagaaggaccttgatc  
F S F C N N G V L V E G E T S P I E A D L V I  
ttggccactggattcaagggtgaaaaaaagctcaaacacattttatgtctcgaacctccaagactac  
L A T G F K G E K K L K H I F M S R T F Q D Y  
attactggatcccctgatgagcccttccactctacagggaatcattcaaccaaggataccacaacta  
I T G S P D A A L P L Y R E C I Q P R I P Q L  
gcagtaactggattctcagagagtattcaaatatattacctcagagatgagatgtagatgggtagca  
A V I G F S E S I S N I F T S E M R C R W V A  
gagcttctgacggcagcttcaagctgccaagcattaaagacatggaataaataaaaagaatgggat  
E L L D G T F K L P S I K D M E I N I K E W D  
gaacttgaacaataactgggtgatactatctgaaagtgcattgggtcttgcataatggtac  
E Y L K Q Y S G G Y Y R R K C I G A L H I W Y  
aatgatcaactgtgcaagatagggatggaaccaaggagaagaagggtttttgcaaacctttt  
N D Q L C K D M A W K P R R K K G F F A E L F  
gaacctatggtccatggattatgtcttaataa  
E P Y G P M D Y V S N \*  
Gctgggtcttacctttgcatgtacacaatccaatctcatctttattgtgtggtttgt  
cccttattttcaataaatgggtttcgggt tagctacaagatactcaaacatgtaagaag  
gaagcacaatgtaagaatgttgggtctcttattgtgtgcaataataaaaaaaaaaaaaaaaaa

Supplemental Figure 5 The full-length cDNA and predicted amino acid sequence of *GhFMO1* and its protein product.



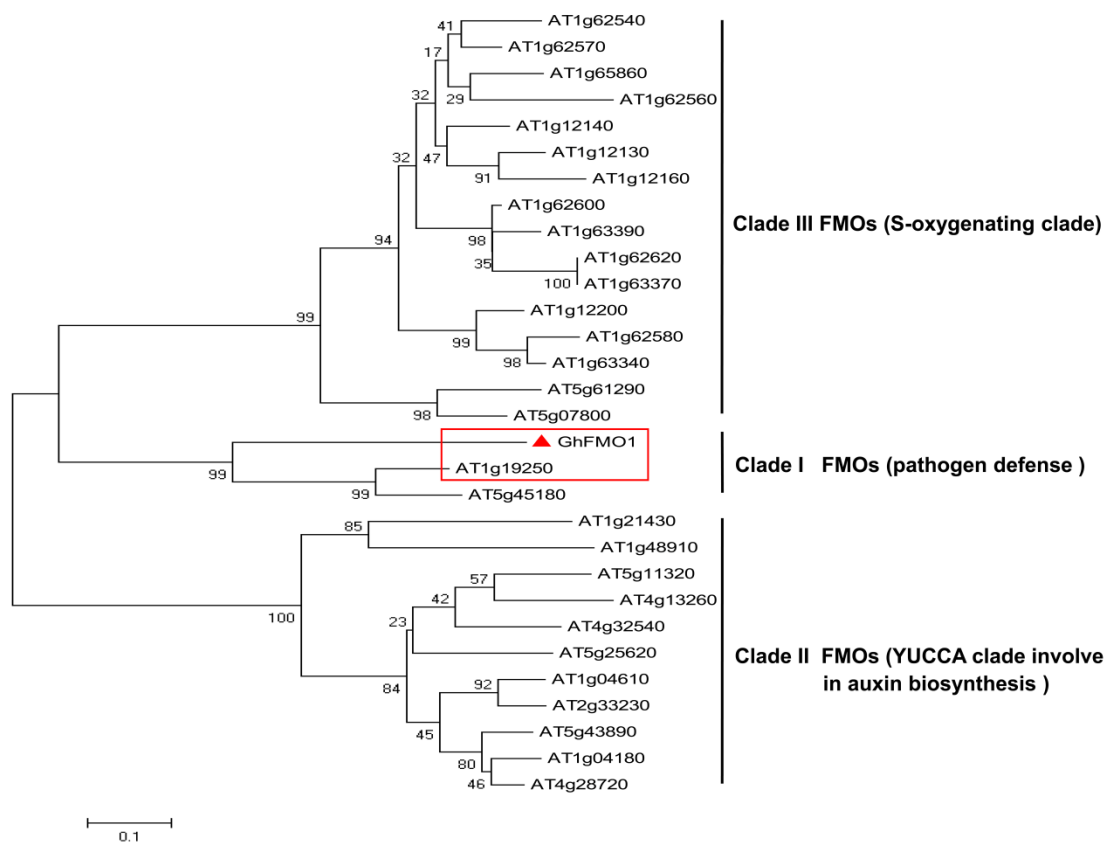

**Supplemental Figure 6** Phylogenetic analysis of the deduced amino acid sequence of *Arabidopsis* FMOs performed by the MEGA 4.0 program.

**Supplemental Table 1** Primers of 38 cotton genes used for qPCR.

| EST      | Sense primer                  | Reverse primer               |
|----------|-------------------------------|------------------------------|
| TC163182 | TGTCCTACTGTTGGCGTTGGTGGTC     | TTTAGCATCCACGACATGGTCCACC    |
| ES844424 | AGACCTCACCGATAGAAGCGGACCT     | CCTGTAGAGTGGAAGGGCTGCATCA    |
| TC139374 | TTCATCTTTTGGCTCATCTTCCG       | GCAAAGTGTTGTTGGAAGTGAGGTT    |
| TC143058 | CCACTGGACTTTGTTTTGATCCGTAG    | AGGTGCCATGTTTAAACGGTAATGATTG |
| DT463342 | TCGTTCTGTTGTAGGAGCGGTTT       | AAGATTGATGTATTTCGCATTTGGAG   |
| TC169837 | TCAGTGGTTTTTCTTTGCTTCGG       | GCAGCGTCATTTAGTGGTGTCTTCT    |
| TC130556 | GATGACTCCACAATCACCGAAGC       | ACACCATAACCCTGTAGCCCCGAC     |
| TC160375 | GCTCTCTGTGATTATTGTCCTTTGC     | CAAAGAATCATAGCCACAAACAAGG    |
| TC166725 | CATTGATTCGGAACATAACTCTGGA     | ACATCCATTGGGAAGGTAAGGG       |
| TC173925 | GGCAAAGCTGATGAGAAAGGAAC       | GAGGAGGACTGAAATACGGTGGA      |
| TC134669 | ACAATACCCATTCTCCATCTCGCT      | ATGCAACTTTGCCTTGATTTTTCA     |
| ES819370 | ACTTGGAACTTCGTCTTCTTCTTCT     | ATTGTTAGCTGTTGCTGCTGGGT      |
| TC170055 | GCTCGTGGTATTATGCCTGGTCT       | CTTTACTGGGTTGTGCCTTTTGAA     |
| TC134956 | TATCATCTTCGCAAACCGACCCA       | TCAACCGCTGGTTTCGTCTTT        |
| TC173850 | GCGTTTGGAGATTCTTATGCTGATAC    | AACCCATCAGAGAAACGACCAGAAG    |
| TC129599 | GACATCAAGCAACTCCAGCCAAG       | TGGGCAGGAAGGTAAGTAGGAGC      |
| TC173903 | GGAGGTGCCTGAGGGTAAGAAACT      | CCTACTCCATCAGTGTCCAATCGG     |
| TC144828 | GTTGTGAGGCGAGAGGAACTGAT       | CCATCAGATGTTGGACGAACTTATT    |
| TC170351 | GGTGTGAGGGTATTGGAAGGCT        | TCAGTCTTGAGTCCCTTTGGTGG      |
| TC156612 | AGATTTTCGGACTIONGCAAGATTGT    | CACATCGCTCTTCTCGTTTACTTTG    |
| TC148447 | GGCAAAAAGTCACCAGGGATAAT       | TTGAGAAGGGGGGAAGATGATTATG    |
| TC135821 | CTAACATCCCAGATTTCCCAAGAGT     | CCACCAACAAAACCACTTCGTATT     |
| TC138391 | TTGGCACAAGGCGAATACATAGCA      | TCGTACTIONGATACCCTCAGATGCG   |
| TC145315 | TAAAGCAGGGGAAGAGAGCAAT        | TAGTCCACACCAGTAAGACCGAAG     |
| TC149040 | CAGATGTTTGTGGAGAACCCTGG       | TGTTTGCCCATCTTTATCTTTGCTC    |
| TC140811 | CAAGAGAAACCACGATTACAGTAACC    | TTCTTCCTTTGCTTCTGTCCTCAT     |
| TC139031 | CCCCTTACGGTGCTTACTGGAGA       | CGACAAAGATTATCGTTGGCGTAG     |
| TC139985 | TTCCGCCATTATCGTAAACACCT       | GTTGAGGAGCAAGTGAAGGGGT       |
| TC147379 | AAGGTAGAAGGGTTAAATGATGCTG     | CAATACATCAGCACTTCCACAGG      |
| TC141300 | TGTAGCCAAGGAAATCTTCACTIONGTC  | GCCAGAATTGTCCGTAAGGAGAGA     |
| TC166651 | AACTCAGGAACTAAAGCAGCCATCG     | TCAACTTTCATTTGTCAGCTTTCCG    |
| TC132413 | CTATCAATGCCTCACCCCTAATGC      | CGGTAGGCTTGACATCGGATTTCCG    |
| TC169259 | CATTCCTTCCTTTCACAACTACCGT     | TTTCCACAGTCACAGCATGTCCAC     |
| TC134243 | TGTTTCCTTTCGCCTGAATCACTIONACC | GACGGTCACCCATTTGGAGTCTTTC    |
| TC153136 | ATTGCCACGCCAACTTACAAACTATT    | TGTGTACCCGACCCGCTCTCCATTTA   |
| TC148709 | AAACCTGGTAAGATTGTTGGGATG      | CTCTGTGAATAATTTTGGTCTCGGA    |
| ES802062 | TGAAGTATCAGCATTATCACCGAGG     | AAATTTTATCTTGAGCCAAAGCAGC    |
| TC160514 | GGAAGAACAAAAGGGGGCACTIONG     | CCGACATAACCAGCGAATCCAC       |
| UB7      | GAAGGCATTCCACCTGACCAAC        | CTTGACCTTCTTCTTCTTGTGCTTG    |

**Supplemental Table 2** Primers for the 6 candidate genes and other genes involved in defense response signaling.

Primers used for VIGS experiments. Sequences in red refer to restriction sites of BamHI linked to sense primers, and KpnI linked to reverse primers

| EST /Gene                               | Sense primer                           | Reverse primer                      |
|-----------------------------------------|----------------------------------------|-------------------------------------|
| Primers for gene fragment amplification |                                        |                                     |
| TC160375                                | CGGGGTACCAGTGGCGCGTGAGGTTAT            | CGCGGATCCGAGAGAACTTTGGAG<br>GGCTT   |
| TC141300                                | CGGGGTACCTTTTTGCCTCGGAAATAGAA          | CGCGGATCCAAGTGGCTTTGTTGAT<br>GGTG   |
| TC134956                                | CGGGGTACCTTCACCTCCTAAAACCACCC          | CGCGGATCCTCCCGTCCACTGTT<br>CTTA     |
| TC148709                                | CGGGGTACCAATAAGCAGTGTGGAGCAT<br>AAAAAC | CGCGGATCCATAAATCTCCTCCATTG<br>TCCCT |
| ES802062                                | CGGGGTACCAGCCTTCCTTGAACAACCAT          | CGCGGATCCCCTCGGTGATAATGC<br>TGA     |
| Primers for RT-PCR analysis             |                                        |                                     |
| TC160375                                | GTAGAGTTCGGGAGGAAGTATCAAG              | AATACATGATTCATCACAGCCCTC            |
| TC141300                                | CGTTATTATGAGGACGGTTGCTG                | TATGGGTGTCTAGTTCTTCTTGAGC           |
| TC134956                                | GGGTGAAGTTTAGGCGTGATG                  | GCAGCATCAGAGGATACGACG               |
| TC148709                                | TTTTCTATAACAATCGACACCG                 | TGGCAGTGCTGATGTGACTC                |
| ES802062                                | GTTGTAACCGGGCGGCCAGTGAA                | CAACAACCGCTCCGTCATCTTCGG            |
| <i>LOX1</i>                             | GATGGACTGGAGATTTGGTTTGC                | GGAGTTCTTCCACCAGGCTTGA              |
| <i>AOS</i>                              | CGATGTCCCAACTTCAATCTCAAAC              | ATCCGACGGTGGAGAATAAACAGT            |
| <i>JAZ1</i>                             | GACCAAATCTTGTGGCATCTACCTC              | CTTGGTCCACTGCTGCTGATT               |
| <i>BUQ7</i>                             | GAAGGCATTCCACCTGACCAAC                 | CTTGACCTTCTTCTTGTGCTTG              |

Primers used in *GhFMO1* overexpressed transgenic tobacco.

| Primer name | sequence                                                   |
|-------------|------------------------------------------------------------|
| FMO1-F      | GGGGACAAGTTTGTACAAAAAAGCAGGCTGCATGGACAGAAAGGTGGCC<br>AT    |
| FMO1-R      | GGGGACCACTTTGTACAAGAAAGCTGGGTCATTAGAGACATAATCCATGG<br>GACC |
| rFmo1-F     | TGGTGAGCCTTTTGGGTCT                                        |
| rFmo1-R     | ACGGCTAAGGTACATGTGTGC                                      |
| APX-F       | AGGACGGTTGCCCGATGCTAAA                                     |
| APX-R       | GATGTGCCCTTCCCAGCGTATGAC                                   |
| CAT-F       | CTCGTGGTTTTGCTGTCAAGTTCT                                   |
| CAT-R       | TTCTCCTGGATATGGGATTTAGGA                                   |
| SABP2-F     | TAGTGGGCGATAGTCTTGGTGGT                                    |
| SABP2-R     | GGAGTTGTGAACAGAATCAGGCA                                    |
| PR-1F       | GGTGTAGAACCTTTGACCTGGGAC                                   |
| PR-1R       | CTCAGCTAGGTTTTCGCCGATTG                                    |
| NPR1-1F     | ATAAAAGAGGAGCACTTGAATCGG                                   |
| NPR1-1R     | TTCTTCAGTTGACGCTCTTCTGCC                                   |

EF-1aF CTCCAAGGCTAGGTATGATG  
EF-1aR CTCGTGGTGCATCTCAAC

---

**Supplemental Table 6** A detailed list of the 38 selected genes putatively involved in broad-spectrum immunity in *Arabidopsis* and the homologous ESTs from *G.hirsutum*.

| AGI code  | Description    | Functions                                                        | References                                               | Accession of Cotton EST |
|-----------|----------------|------------------------------------------------------------------|----------------------------------------------------------|-------------------------|
| AT1G30700 | FAD-bindin     | n                                                                | -                                                        | TC163182                |
| AT1G19250 | FMO1           | Cell death; Required for systemic acquired resistance            | (Bartsch, <i>et al.</i> , 2006; Mishina and Zeier, 2006) | ES844424                |
| AT2G35980 | NHL10          | Independent of SA/JA/ET during CMV-induced HR treatment          | (Zheng <i>et al.</i> , 2004)                             | TC139374                |
| AT5G13080 | WRKY75         | oxidative burst; mainly active JA/ET pathway                     | (Chen <i>et al.</i> , 2013)                              | TC143058                |
| AT5G10520 | RBK1           | Plant-microbe interaction                                        | (Molendijk <i>et al.</i> , 2008)                         | DT463342                |
| AT1G07260 | UGT71C3        | Glucosylation of flavonoids                                      | (Terasaka <i>et al.</i> , 2012)                          | TC169837                |
| AT3G12500 | PR3            | JA-inducible genes                                               | (Thomma <i>et al.</i> , 1998)                            | TC130556                |
| AT2G34500 | CYP710A        | Biosynthesis of stigmasterol                                     | (Griebel and rgen Zeier, 2010)                           | TC160375                |
| AT1G21240 | WAK3           | n                                                                | -                                                        | TC166725                |
| AT5G40990 | GLIP1          | Functions independently of SA but requires ET signaling          | (Oh <i>et al.</i> , 2005)                                | TC173925                |
| AT3G54640 | TSA1           | The penultimate reaction in the biosynthesis of tryptophan       | (Radwanski <i>et al.</i> , 1995)                         | TC134669                |
| AT1G30135 | JAZ8           | Negative regulation of JA signaling                              | (Chini <i>et al.</i> , 2007)                             | ES819370                |
| AT5G44480 | GAE1           | Biosynthesis of d-Galacturonate                                  | (Seifert <i>et al.</i> , 2002)                           | TC170055                |
| AT4G37370 | CYP81D8        | Flavanoid biosynthesis                                           | (klok <i>et al.</i> 2002)                                | TC134956                |
| AT5G03610 | GDSL-moti      | n                                                                | -                                                        | TC173850                |
| AT2G26560 | PLA2A          | scavenging and protection against ROS production                 | (Licausi <i>et al.</i> , 2010)                           | TC129599                |
| AT3G04720 | PR4            | JA-mediated defense system                                       | (Thomma <i>et al.</i> , 1998)                            | TC173903                |
| AT2G43820 | UGT74F2        | Involved in metabolites of SA/tryptophan pathway                 | (Dean and Delaney, 2008)                                 | TC144828                |
| AT1G69490 | NAP            | responsible for senescence                                       | (Guo and Gan, 2006)                                      | TC170351                |
| AT1G09970 | RLK7           | required for proper germination speed and tolerance to oxidative | (Pitorre <i>et al.</i> , 2010)                           | TC156612                |
| AT1G80840 | WRKY40         | Involved in SA/JA signaling                                      | (Xu <i>et al.</i> , 2006)                                | TC148447                |
| AT5G51060 | RHD2           | Involved in antioxidant metabolism and oxidative burst           | (Qureshi <i>et al.</i> , 2013)                           | TC135821                |
| AT5G27600 | LACS7          | fatty acid catabolism                                            | (Fulda <i>et al.</i> , 2002)                             | TC138391                |
| AT3G14680 | CYP72A14       | n                                                                | -                                                        | TC145315                |
| AT5G24240 | PI3_PI4_kinase | n                                                                | -                                                        | TC149040                |
| AT5G49520 | WRKY48         | negative regulator of JA-responsive defense gene                 | (Xing <i>et al.</i> , 2008)                              | TC140811                |
| AT2G24180 | CYP71B6        | n                                                                | -                                                        | TC139031                |
| AT1G22360 | UGT85A2        | n                                                                | -                                                        | TC139985                |
| AT5G17990 | TRP1           | Tryptophan biosynthesis                                          | (Last <i>et al.</i> , 1991)                              | TC147379                |
| AT4G31970 | CYP82          | Indole glucosinolate biosynthesis                                | (Liu <i>et al.</i> , 2010)                               | TC141300                |
| AT3G51860 | CAX3           | Calcium transport                                                | (Manohar <i>et al.</i> , 2011)                           | TC166651                |
| AT2G37260 | TTG2           | Regulation of flavonoid biosynthesis                             | (Xu <i>et al.</i> , 2013)                                | TC132413                |
| AT2G38120 | AUX1           | Auxin polar transport/ response to IAA, ET stimulus              | (Pickett <i>et al.</i> , 1990)                           | TC169259                |
| AT4G21200 | GA2OX8         | gibberellin metabolism oxidation-reduction process               | (Schomburg <i>et al.</i> , 2003)                         | TC134243                |
| AT4G02130 | GATL6          | Involved in cell wall biosynthesis                               | (Kong <i>et al.</i> , 2011)                              | TC153136                |
| AT5G40380 | RLK42          | n                                                                | -                                                        | TC148709                |
| AT2G42380 | bZIP34         | n                                                                | -                                                        | ES802062                |
| AT1G78430 | RIP4           | n                                                                | -                                                        | TC160514                |

n, annotation concerned with biotic stress was not found.

## Supplementary References

- Chen X, Liu J, Lin G, Wang A, Wang Z and Lu G.** 2013. Overexpression of *AtWRKY28* and *AtWRKY75* in *Arabidopsis* enhances resistance to oxalic acid and *Sclerotinia sclerotiorum*. *Plant Cell Reports* **32**, 1589-1599.
- Chini A, Fonseca S, Fernández G, et al.** 2007. The JAZ family of repressors is the missing link in jasmonate signalling. *Nature* **448**, 666-671.
- Dean JV and Delaney SP.** 2008. Metabolism of salicylic acid in wild-type, *ugt74f1* and *ugt74f2* glucosyltransferase mutants of *Arabidopsis thaliana*. *Physiologia Plantarum* **132**, 417-425.
- Fulda M, Shockey J, Werber M, Wolter FP and Heinz E.** 2002. Two long-chain acyl-CoA synthetases from *Arabidopsis thaliana* involved in peroxisomal fatty acid  $\beta$ -oxidation. *Plant Journal* **32**, 93-103.
- Griebel T and Rgen Zeier J.** 2010. A role for beta-sitosterol to stigmasterol conversion in plant-pathogen interactions. *Plant Journal* **63**, 254-268.
- Guo Y and Gan S.** 2006. AtNAP, a NAC family transcription factor, has an important role in leaf senescence. *Plant Journal* **46**, 601-612.
- Klok EJ, Wilson IW, Wilson D, Chapman SC, Ewing RM, Somerville SC, Peacock WJ, Dolferus R and Dennis ES.** 2002. Expression profile analysis of the low-oxygen response in *Arabidopsis* root cultures. *Plant Cell* **14**, 2481-2494.
- Kong Y, Zhou G, Yin Y, Xu Y, Pattathil S and Hahn MG.** 2011. Molecular analysis of a family of *Arabidopsis* genes related to galacturonosyltransferases. *Plant Physiology* **155**, 1791-1805.
- Last RL, Bissinger PH, Mahoney DJ, Radwanski ER and Fink GR.** 1991. Tryptophan mutants in *Arabidopsis*: the consequences of duplicated tryptophan synthase beta genes. *Plant Cell* **3**, 345-358.
- Licausi F, Van Dongen JT, Giuntoli B, Novi G, Santaniello A, Geigenberger P and Perata P.** 2010. *HRE1* and *HRE2*, two hypoxia-inducible ethylene response factors, affect anaerobic responses in *Arabidopsis thaliana*. *Plant Journal* **62**, 302-315.
- Manohar M, Shigaki T, Mei H, Park S, Marshall J, Aguilar J and Hirschi KD.**

2011. Characterization of *Arabidopsis* Ca<sup>2+</sup>/H<sup>+</sup> exchanger CAX3. *Biochemistry* **50**, 6189-6195.

**Molendijk AJ, Ruperti B, Singh MK, et al.** 2008. A cysteine-rich receptor-like kinase NCRK and a pathogen-induced protein kinase RBK1 are Rop GTPase interactors. *Plant Journal* **53**, 909-923.

**Oh IS, Park AR, Bae MS, Kwon SJ, Kim YS, Lee JE, Kang NY, Lee S, Cheong H and Park OK.** 2005. Secretome analysis reveals an *Arabidopsis* lipase involved in defense against *Alternaria brassicicola*. *Plant Cell* **17**, 2832-2847.

**Pickett FB, Wilson AK and Estelle M.** 1990. The *aux1* mutation of *Arabidopsis* confers both auxin and ethylene resistance. *Plant Physiology* **94**, 1462-1466.

**Pitorre D, Llauro C, Jobet E, Guillemot J, Brizard JP, Delseny M and Lasserre E.** 2010. RLK7, a leucine-rich repeat receptor-like kinase, is required for proper germination speed and tolerance to oxidative stress in *Arabidopsis thaliana*. *Planta* **232**, 1339-1353.

**Qureshi MK, Sujeeth N, Gechev TS and Hille J.** 2013. The zinc finger protein ZAT11 modulates paraquat-induced programmed cell death in *Arabidopsis thaliana*. *Acta Physiologiae Plantarum* **35**, 1863-1871.

**Radwanski ER, Zhao J and Last RL.** 1995. *Arabidopsis thaliana* tryptophan synthase alpha: gene cloning, expression, and subunit interaction. *MGG* **248**, 657-667.

**Schomburg FM, Bizzell CM, Lee DJ, Zeevaart JA and Amasino RM.** 2003. Overexpression of a novel class of gibberellin 2-oxidases decreases gibberellin levels and creates dwarf plants. *Plant Cell* **15**, 151-163.

**Seifert GJ, Barber C, Wells B, Dolan L and Roberts K.** 2002. Galactose biosynthesis in *Arabidopsis*: genetic evidence for substrate channeling from UDP-D-Galactose into cell wall polymers. *Current Biology* **12**, 1840-1845.

**Terasaka K, Mizutani Y, Nagatsu A and Mizukami H.** 2012. In situ UDP-glucose regeneration unravels diverse functions of plant secondary product glycosyltransferases. *FEBS letters* **586**, 4344-4350.

**Thomma BP, Eggermont K, Penninckx IA, Mauch-Mani B, Vogelsang R, Cammue BP and Broekaert WF.** 1998. Separate jasmonate-dependent and

salicylate-dependent defense-response pathways in *Arabidopsis* are essential for resistance to distinct microbial pathogens. *Proceedings of the National Academy of Sciences of the United States of America* **95**, 15107-15111.

**Xing DH, Lai ZB, Zheng ZY, Vinod K, Fan B-F and Chen ZX.** 2008. Stress-and pathogen-induced *Arabidopsis* WRKY48 is a transcriptional activator that represses plant basal defense. *Molecular Plant* **1**, 459-470.

**Xu X, Chen C, Fan B and Chen Z.** 2006. Physical and functional interactions between pathogen-induced *Arabidopsis* WRKY18, WRKY40 and WRKY60 transcription factors. *Plant Cell* **18**, 1310-1326.

**Xu W, Grain D, Gourrierc J, Harsco ä E, Berger A, Jauvion V, Scagnelli A, Berger N, Bidzinski P and Kelemen Z.** 2013. Regulation of flavonoid biosynthesis involves an unexpected complex transcriptional regulation of TT8 expression, in *Arabidopsis*. *New Phytologist* **198**, 59-70.

**Zheng MS, Takahashi H, Miyazaki A, Hamamoto H, Shah J, Yamaguchi I and Kusano T.** 2004. Up-regulation of *Arabidopsis thaliana* NHL10 in the hypersensitive response to Cucumber mosaic virus infection and in senescing leaves is controlled by signalling pathways that differ in salicylate involvement. *Planta* **218**, 740-750.
